# Supplementary material for: On the Fundamental Constants of Nature
Source: Preprints.org preprint supplement (doi:10.20944/preprints202006.0017.v1), 2020-06-03
Supplement: Supplementary file 1 [file supplementary]

NEW FOUNDATIONS MODEL

|                  |                               | Maximum Potential                                 | Proportionality Operators |                               |                               | Natural Formula               |                                                                                |
|------------------|-------------------------------|---------------------------------------------------|---------------------------|-------------------------------|-------------------------------|-------------------------------|--------------------------------------------------------------------------------|
|                  |                               | Traditional equation                              |                           | <i>length</i>                 | <i>mass</i>                   | <i>time</i>                   | $\frac{\Delta x}{\Delta t}$                                                    |
| Mechanics        |                               |                                                   |                           |                               |                               |                               |                                                                                |
|                  | Photon momentum               | $p_{\gamma} = \frac{\hbar}{\lambda}$              | $p_P$                     | $\frac{l_P}{\lambda}$         |                               |                               | $p = p_P \frac{l_P}{\lambda}$                                                  |
|                  | Photon energy                 | $E_{\gamma} = \frac{\hbar c}{\lambda}$            | $E_P$                     | $\frac{l_P}{\lambda}$         |                               |                               | $E = E_P \frac{l_P}{\lambda}$                                                  |
|                  | Compton wavelength            | $\lambda_c = \frac{\hbar}{mc}$                    | $l_P$                     |                               | $\frac{m_0}{m_P}$             |                               | $\lambda = l_P \frac{m_P}{m_0}$                                                |
|                  | de Broglie wavelength         | $\lambda = \frac{\hbar}{mv}$                      | $l_P$                     |                               | $\frac{m_0}{m_P}$             | $\frac{v}{c}$                 | $\lambda = l_P \frac{m_P}{m_0} \frac{c}{v}$                                    |
|                  | Momentum                      | $p = \frac{\hbar}{\lambda}$                       | $p_P$                     | $\frac{l_P}{\lambda}$         |                               |                               | $p = p_P \frac{l_P}{\lambda}$                                                  |
|                  | Kinetic energy                | $E_k = \frac{1}{2}mv^2$                           | $E_P$                     |                               |                               | $\frac{t_P}{T}$               | $E_k = E_P \frac{1}{2} \frac{t_P}{T}$                                          |
| Gravitation      |                               |                                                   |                           |                               |                               |                               |                                                                                |
|                  | Schwarzschild radius          | $r_s = \frac{2G}{c^2}$                            | $l_P$                     |                               | $\frac{M}{m_P}$               |                               | $r = l_P \sqrt{2} \frac{M}{m_P}$                                               |
|                  | Escape velocity               | $v_e = \left(\frac{-2GM}{r}\right)^{\frac{1}{2}}$ | $\frac{l_P}{t_P}$         | $\frac{l_P}{r}$               | $\frac{M}{m_P}$               |                               | $v = \frac{l_P}{t_P} \left(2 \frac{l_P}{r} \frac{M}{m_P}\right)^{\frac{1}{2}}$ |
|                  | Energy potential              | $U_g = \frac{-GMm}{r}$                            | $E_P$                     | $\frac{l_P}{r}$               | $\frac{M}{m_P} \frac{m}{m_P}$ |                               | $E = E_P \frac{l_P}{r} \frac{M}{m_P} \frac{m}{m_P}$                            |
|                  | Acceleration potential        | $g = \frac{-GM}{r^2}$                             | $a_P$                     | $\frac{l_P}{r} \frac{l_P}{r}$ | $\frac{M}{m_P}$               |                               | $a = a_P \frac{l_P}{r} \frac{l_P}{r} \frac{M}{m_P}$                            |
|                  | Force potential               | $F = \frac{-GMm}{r^2}$                            | $F_P$                     | $\frac{l_P}{r} \frac{l_P}{r}$ | $\frac{M}{m_P} \frac{m}{m_P}$ |                               | $F = F_P \frac{l_P}{r} \frac{l_P}{r} \frac{M}{m_P} \frac{m}{m_P}$              |
|                  | Black hole energy ( $k_B T$ ) | $k_B T = \frac{\hbar c^3}{8\pi GM}$               | $E_P$                     |                               | $\frac{M}{m_P}$               |                               | $E = E_P \frac{1}{8\pi} \frac{m_P}{M}$                                         |
| Electromagnetism |                               |                                                   |                           |                               |                               |                               |                                                                                |
|                  | Electrostatic potential       | $F = k_e \frac{q_1 q_2}{r^2}$                     | $F_P$                     | $\frac{l_P}{r} \frac{l_P}{r}$ |                               | $\frac{t_P}{t} \frac{t_P}{t}$ | $F = F_P \frac{l_P}{r} \frac{l_P}{r} \frac{t}{t_P} \frac{t}{t_P}$              |

$l_p$  = Planck length

$t_p$  = Planck time

$E_p$  = Planck energy

$F_p$  = Planck force

$m_p$  = Planck mass

$p_p$  = Planck momentum

$a_p$  = Planck acceleration

David Humpherys
