# Supplementary material for: On the Fundamental Constants of Nature
Source: Preprints.org preprint supplement (doi:10.20944/preprints202006.0017.v1), 2020-06-03
Supplement: Supplementary file 2 [file supplementary]

# CONSTANTS OF NATURE

| Constant                 | Symbol       | Elementary form                | Alternate form           | MKS value                                                                       | EM value                                             |
|--------------------------|--------------|--------------------------------|--------------------------|---------------------------------------------------------------------------------|------------------------------------------------------|
| Fundamental              |              |                                |                          |                                                                                 |                                                      |
| Planck length            | $l_p$        | $l_p$                          |                          | 1.616 255 x 10 <sup>-35</sup> <i>m</i>                                          |                                                      |
| Planck mass              | $m_p$        | $m_p$                          |                          | 2.176 434 x 10 <sup>-8</sup> <i>kg</i>                                          |                                                      |
| Planck time              | $t_p$        | $t_p$                          |                          | 5.391 247 x 10 <sup>-44</sup> <i>s</i>                                          |                                                      |
| Planck charge            | $q_p$        | $t_p$                          |                          | 5.391 247 x 10 <sup>-44</sup> <i>s</i>                                          | 1.875 546 x 10 <sup>-18</sup> <i>C</i>               |
| Composite                |              |                                |                          |                                                                                 |                                                      |
| Planck momentum          | $p_p$        | $\frac{l_p m_p}{t_p}$          | $m_p c$                  | 6.524 786 <i>kgms<sup>-1</sup></i>                                              |                                                      |
| Planck energy            | $E_p$        | $\frac{l_p^2 m_p}{t_p^2}$      | $m_p c^2$                | 1,956,081,000 <i>kgm<sup>2</sup>s<sup>-2</sup></i>                              |                                                      |
| Planck's constant        | $\hbar$      | $\frac{l_p^2 m_p}{t_p}$        | $l_p p_p, E_p t_p$       | 1.054 571... x 10 <sup>-34</sup> <i>kgm<sup>2</sup>s<sup>-1</sup></i>           |                                                      |
| Gravitational constant   | $G$          | $\frac{l_p^3}{m_p t_p^2}$      | $\frac{l_p}{m_p} c^2$    | 6.674 30 x 10 <sup>-11</sup> <i>m<sup>3</sup>kg<sup>-1</sup>s<sup>-2</sup></i>  |                                                      |
| Speed of Light           | $c$          | $\frac{l_p}{t_p}$              | $c$                      | 299,792,458 <i>ms<sup>-1</sup></i>                                              |                                                      |
| Elementary charge        | $e$          | $t_p \sqrt{\alpha}$            |                          | 4.605 448 x 10 <sup>-45</sup> <i>s</i>                                          | 1.602 177 x 10 <sup>-19</sup> <i>C</i>               |
| Electric constant        | $\epsilon_0$ | $\frac{t_p^4}{4\pi l_p^3 m_p}$ | $\frac{1}{4\pi F_p c^2}$ | 7.315 968 x 10 <sup>-63</sup> <i>s<sup>4</sup>kg<sup>-1</sup>m<sup>-3</sup></i> | 8.854 188 x 10 <sup>-12</sup> <i>Fm<sup>-1</sup></i> |
| Magnetic constant        | $\mu_0$      | $4\pi \frac{l_p m_p}{t_p^2}$   | $4\pi F_p$               | 1.520 851 x 10 <sup>45</sup> <i>kgms<sup>-2</sup></i>                           | 1.256 637 x 10 <sup>-6</sup> <i>NA<sup>-2</sup></i>  |
| Vacuum Impedance         | $Z_0$        | $4\pi \frac{l_p^2 m_p}{t_p^3}$ | $4\pi \frac{E_p}{t_p}$   | 4.559 397 x 10 <sup>53</sup> <i>kgm<sup>2</sup>s<sup>-3</sup></i>               | 376. 730 314 $\Omega$                                |
| Voltage potential        | $V_p$        | $\frac{l_p^2 m_p}{t_p^3}$      | $\frac{E_p}{t_p}$        | 3.628 253 x 10 <sup>52</sup> <i>kgm<sup>2</sup>s<sup>-3</sup></i>               | 1.042 940 x 10 <sup>27</sup> <i>V</i>                |
| Current potential        | $I_p$        | $\frac{t_p}{t_p}$              |                          | 1                                                                               | 3.478 873 x 10 <sup>25</sup> <i>A</i>                |
| Inductance potential     | $L_p$        | $\frac{l_p^2 m_p}{t_p^2}$      | $E_p$                    | 1,956,081,000 <i>kgm<sup>2</sup>s<sup>-2</sup></i>                              | 1.616 255 x 10 <sup>-42</sup> <i>H</i>               |
| Mag inductance potential | $B_p$        | $\frac{m_p}{t_p^2}$            | $\frac{p_p}{l_p t_p}$    | 7.488 021 x 10 <sup>78</sup> <i>kgs<sup>-2</sup></i>                            | 2.152 428 x 10 <sup>53</sup> <i>T</i>                |
| Conductance potential    | $G_p$        | $\frac{t_p^3}{l_p^2 m_p}$      | $\frac{t_p}{E_p}$        | 2.756 147 x 10 <sup>-53</sup> <i>s<sup>3</sup>kg<sup>-1</sup>m<sup>-2</sup></i> | 3.335 641 x 10 <sup>-2</sup> <i>S</i>                |
| Impedance potential      | $Z_p$        | $\frac{l_p^2 m_p}{t_p^3}$      | $\frac{E_p}{t_p}$        | 3.628 253 x 10 <sup>52</sup> <i>kgm<sup>2</sup>s<sup>-3</sup></i>               | 29.979 25 $\Omega$                                   |
| Capacitance potential    | $C_p$        | $\frac{t_p^4}{l_p^2 m_p}$      | $\frac{t_p^2}{E_p}$      | 1.485 907 x 10 <sup>-96</sup> <i>s<sup>4</sup>kg<sup>-1</sup>m<sup>-2</sup></i> | 1.798 326 x 10 <sup>-45</sup> <i>F</i>               |
